# Supplementary material for: A nitrogen-containing carbon film derived from vapor phase polymerized polypyrrole as a fast charging/discharging capability anode for lithium-ion batteries
Source: Royal Society of Chemistry journal article supplement (doi:10.1039/c5cc06964e), 2015-10-15
Supplement: c5cc06964e1.pdf [file c5cc06964e1.pdf]

## Nitrogen-containing carbon film derived from vapor phase polymerized polypyrrole as a fast charge/discharge capability anode for lithium-ion batteries

Tao Yuan,<sup>a,b,c,d</sup> Yu-Shi He,<sup>a,d</sup> Weimin Zhang,<sup>\* a,b</sup> and Zi-Feng Ma<sup>\* a,b</sup>

<sup>a</sup>Shanghai Electrochemical Energy Devices Research Centre, School of Chemistry and Chemical Engineering, Shanghai Jiao Tong University, Shanghai, 200240, China. Email: zfma@sjtu.edu.cn; wm\_zhang@sjtu.edu.cn.

<sup>b</sup>Sinopoly Battery Research Centre, Shanghai, 200241, China.

<sup>c</sup>School of Materials Science and Engineering, University of Shanghai for Science and Technology, Shanghai, 200093, China.

<sup>d</sup> Dr Tao Yuan and Dr Yu-Shi He contributed equally to this work.

### Experimental Section

#### Synthesis of N-C film electrode.

PPy film was synthesized by a vapor phase polymerization method. Briefly, Fe (II) *p*-toluenesulfonate (Sigmaaldrich) was coated onto a glass slide substrate from a 20 % solution in *n*-butanol solvent. The coated glass slide was dried on a hot plate with a temperature of 75 °C and then exposed to pyrrole vapor at room temperature. After 15 min, the color of the oxidant coating turned to be dark yellow which indicated the formation of PPy. For pyrolysis of the PPy, the film was firstly peeled off from the glass by soaking in ethanol solvent and then dried in the air by hanging on a stainless steel wire. Then the PPy film was calcined in a stream of Ar at 700 °C for 2 h with the heating rate of 2 °C min<sup>-1</sup> to obtain a nitrogen-containing carbon film.

#### Physical characterizations

The morphologies and microstructure of the samples were monitored using a FEI Nova SEM 230 ultra-high resolution FE-SEM equipped (INCA X-Max 80, Oxford Instruments), and a TEM (JEM-2100F, JEOL Ltd., Japan). The porosity and BET surface areas for the samples were measured using a nitrogen sorption instrument (Micromeritics, ASAP2020). The crystalline property of materials was examined by XRD measurements using a Rigaku D/MAX-2200/PC X-ray diffractometer at 40 kV and 20 mA, with a Cu K $\alpha$  radiation source. The Raman spectroscopies of the PPy and N-C film samples were obtained in Dispersive Raman Microscope (Senterra R200-L, Germany). The surface properties of the samples were analyzed by X-ray

photoelectron spectrometer (XPS, Kratos Axis Ultra DLD).

### **Electrochemical measurements**

The lithium ion battery measurements were performed using 2016 coin cells for half-cell system at room temperature. The N-C film was cut into round pieces with a diameter of 1.4 cm, which was used as the electrode directly and the conducting additive and binder are not required for the electrode fabrication. The electrodes were dried in a vacuum oven at 100 °C for 24 h before being transferred into a glove box. The coin cells were assembled with lithium-metal as counter and reference electrode, Celgard 2400 as the separator, and 1 M LiPF<sub>6</sub>/EC/DMC (1:1 by volume ratio) as electrolyte respectively. The charge/discharge electrochemical performances were tested in the potential range of 0.01-3.0 V vs. Li/Li<sup>+</sup> using a LAND CT2001A model battery test system (Wuhan Jinnuo Electronics, Ltd.) under a constant current mode. The cyclic voltammetry (CV) tests were performed over the potential range of 0.01-3.0 V using a CHI 660 potentiostat with a scan rates from 0.1mV s<sup>-1</sup>. The EIS testings were conducted using a VersaSTAT 4 potentiostat by using a three-electrode, with the N-C film as a working electrode, a lithium ring as a reference, and a piece of lithium disk as a counter electrode.

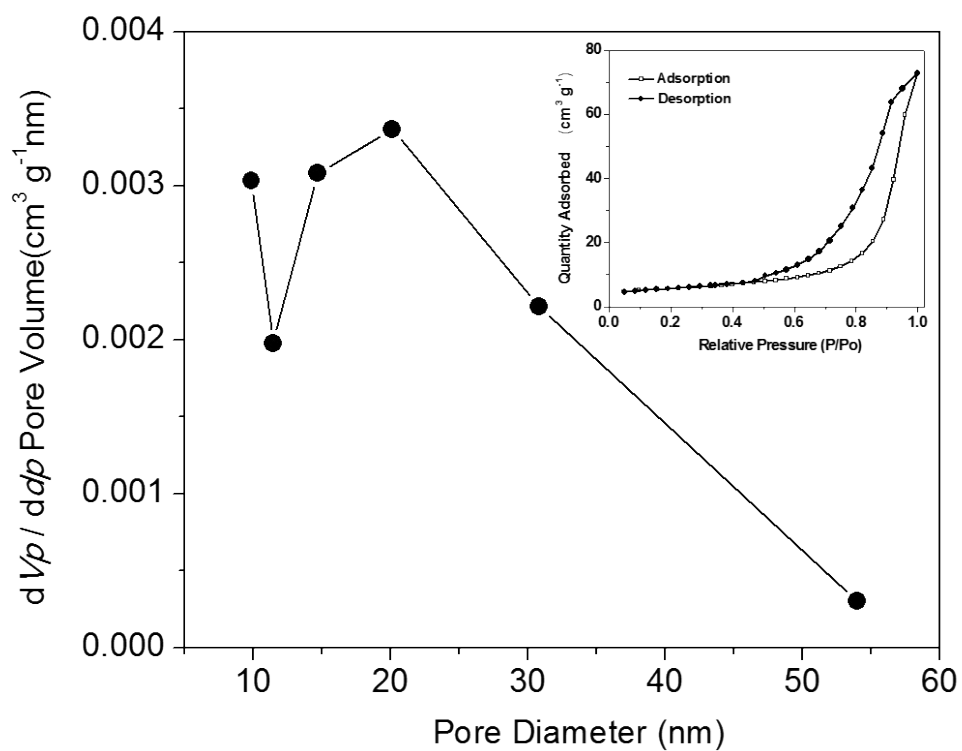

Figure S1 .BJH pore size distribution plot and nitrogen adsorption-desorption isotherms (inset) of N-C film.

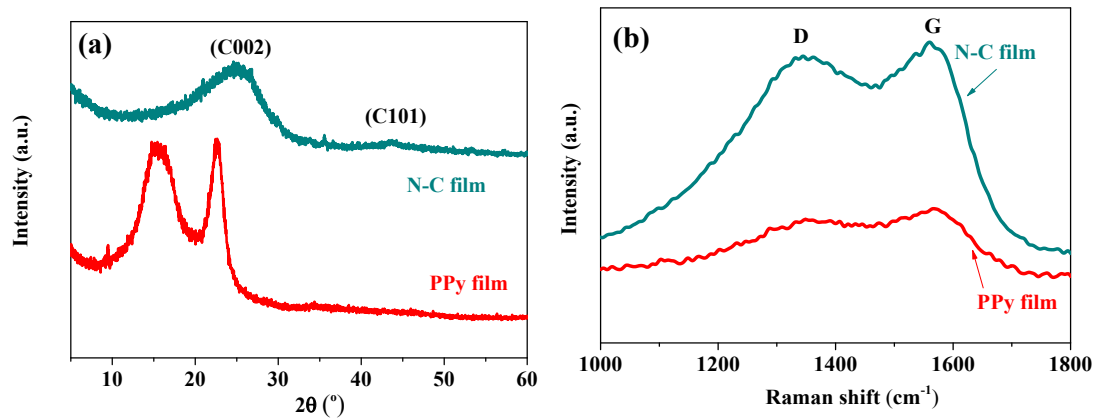

Figure S2 XRD patterns (a) and Raman spectra (b) of vapor phased polymerized PPy film and the corresponding N-C film.

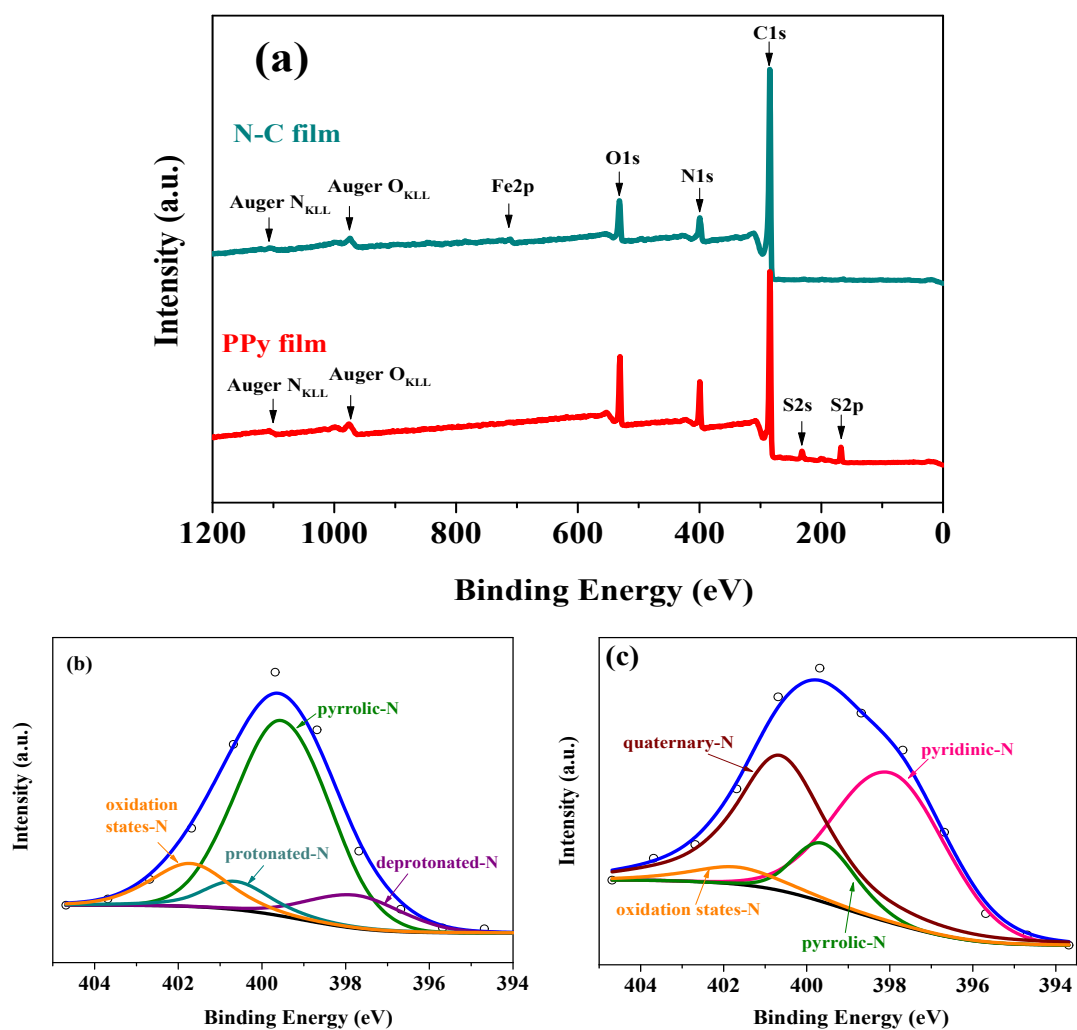

Figure S3 XPS survey spectra (a) and high-resolution XPS spectra of N1s of the PPy film (b) and N-C film (c).

Table S1. Elemental composition of polypyrrole (PPy) films and N-C Films.

|     | <b>%at. C</b> | <b>%at. N</b> | <b>%at. O</b> | <b>%at. S</b> | <b>%at. Fe</b> |
|-----|---------------|---------------|---------------|---------------|----------------|
| PPy | 78.6          | 11.4          | 8.8           | 1.2           | --             |
| N-C | 85.6          | 8.1           | 6.1           | --            | 0.2            |

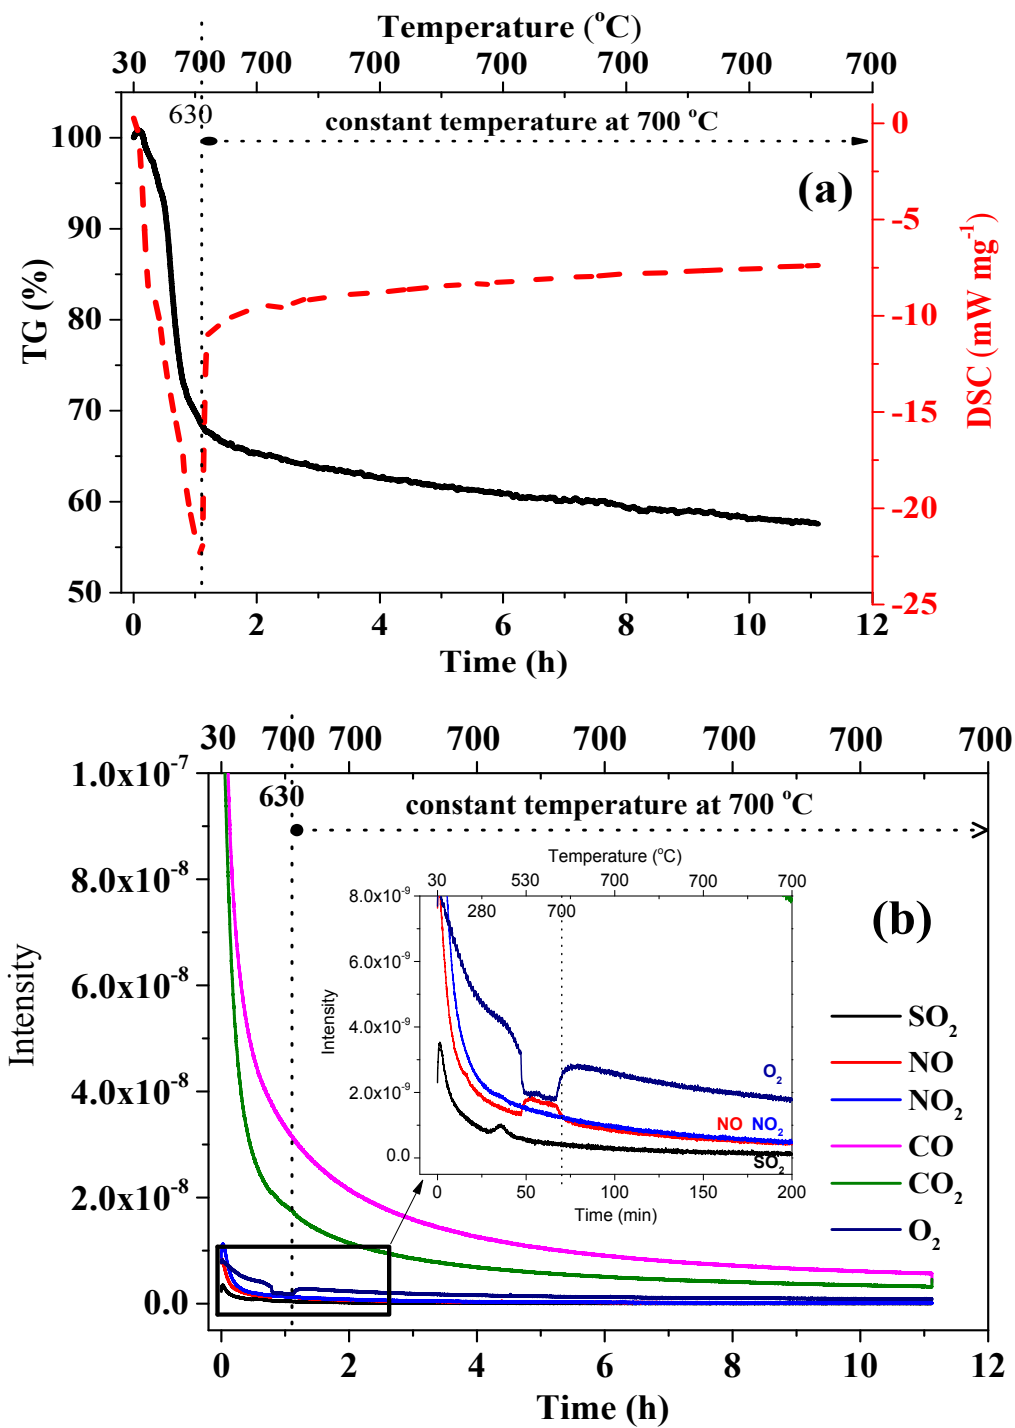

Figure S4 (a) TG-DSC curves of calcination process of PPy film from room temperature to 700 °C in Ar atmosphere with a heating rate of 10 °C min<sup>-1</sup> and the temperature was held at 700 °C for 10 h; (b) MS profiles of released gases during heating process of TG.

Table S2. Comparison of the rate and cycling capability of N-C film synthesized in this work with those of carbonized products from PPy and other polymers reported in the literatures

| Samples                          | Preparation method of conductive polymer                   | Initial current densities (mA g <sup>-1</sup> ) | Initial reversible capacity (mAh g <sup>-1</sup> ) | High current densities (mA g <sup>-1</sup> ) | Corresponding capacity (mAh g <sup>-1</sup> ) | Capacity retention (%) | Ref.      |
|----------------------------------|------------------------------------------------------------|-------------------------------------------------|----------------------------------------------------|----------------------------------------------|-----------------------------------------------|------------------------|-----------|
| Free-standing N-C film           | vapor phase polymerization of pyrrole                      | 500                                             | 908.4                                              | 5000                                         | 502 after 50 cycles                           | 55.3                   | This work |
| Carbon nanospheres               | Chemical oxidation of pyrrole                              | 60                                              | 420                                                | 3000                                         | 190                                           | 45.2                   | 1         |
| Porous Carbon Nanofibers         | Chemical oxidation of pyrrole                              | 0.5C                                            | 400                                                | 30C                                          | 155.4 after 400 cycles                        | 38.9                   | 2         |
| Non-graphitic carbon nanotubes   | Chemical oxidation self-assembly of pyrrole                | 100                                             | 635.7                                              | 4000                                         | 280.1 after 60 cycles                         | 44.1                   | 3         |
| carbon nanofiber webs            | modified oxidative template assembly route of pyrrole      | 100                                             | 1280                                               | 2000                                         | 943 after 600 cycles                          | 73.7                   | 4         |
| N-rich porous carbon spheres     | Chemical oxidation +Template etching technology of pyrrole | 500                                             | 666                                                | 3000                                         | 215 after 20 cycles                           | 32.3                   | 5         |
| Mesoporous nitrogen-rich carbons | Pyrolyze protein                                           | 100                                             | 1780                                               | 4000                                         | 205 after 90 cycles                           | 11.5                   | 6         |
| Porous carbon foams              | pyrolysis of phenolic resin from a dual-template approach  | 0.1C                                            | 156                                                | 0.1C                                         | about 80 after 50 cycles                      | 51.3                   | 7         |
| Carbon Nanofibers                | electrospun polyacrylonitrile membranes.                   | 100                                             | 340                                                | 1000                                         | 152.7 after 80 cycles                         | 44.9                   | 8         |



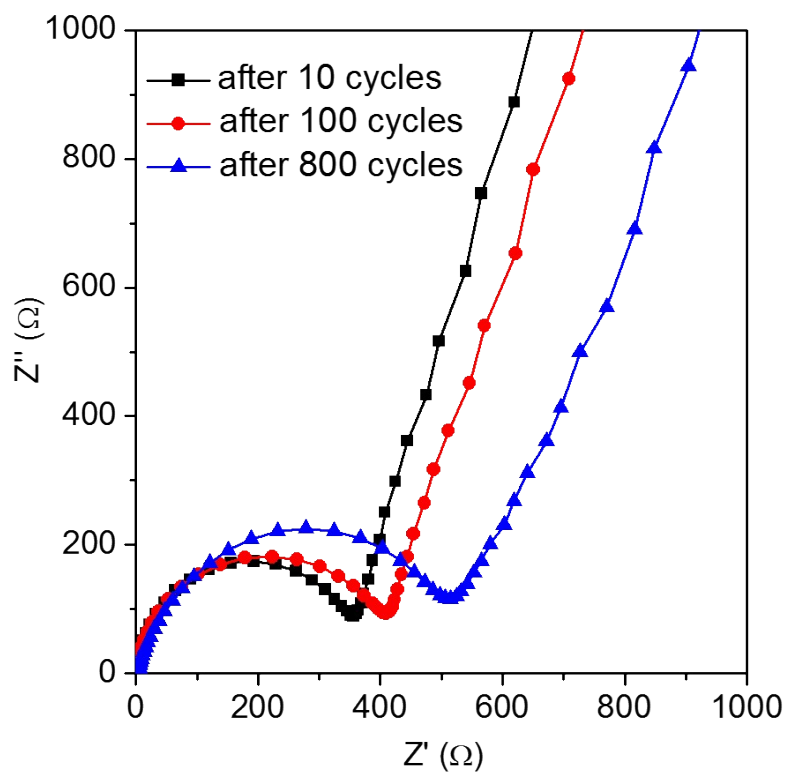

Figure S5 Nyquist plots of the N-C film electrode after different cycles obtained by applying a sine wave with amplitude of 10.0 mV over the frequency range of 100 kHz-100 mHz.

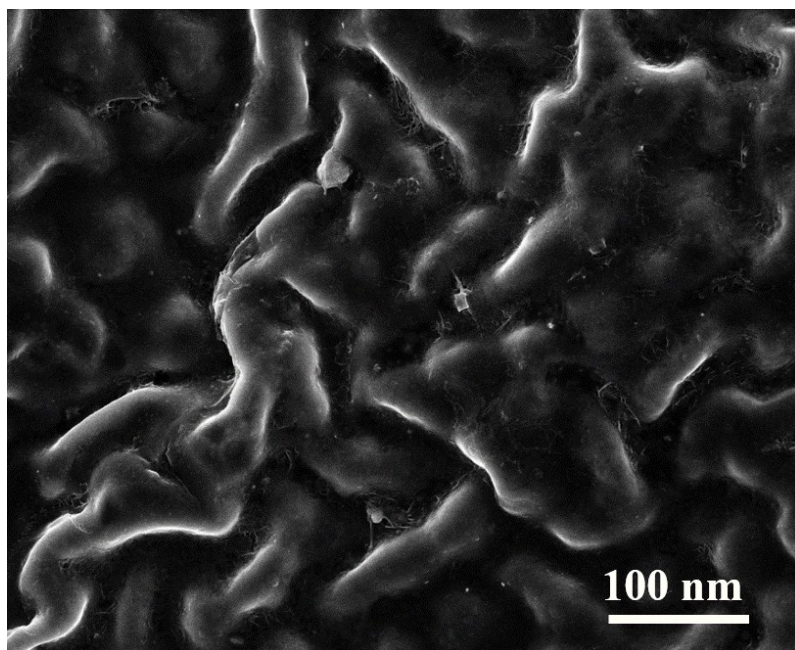

---

Figure S6 SEM image of N-C film electrode after 100 charge-discharge cycles.

## References

1. Y. Wang, F. Su, C. D. Wood, J. Y. Lee and X. S. Zhao, *Industrial & Engineering Chemistry Research*, 2008, **47**, 2294.
2. C. Li, X. Yin, L. Chen, Q. Li and T. Wang, *The Journal of Physical Chemistry C*, 2009, **113**, 13438.
3. M. Wu, J. Chen, C. Wang, F. Wang and B. Yi, *Electrochimica Acta*, 2013, **105**, 462.
4. L. Qie, W. M. Chen, Z. H. Wang, Q. G. Shao, X. Li, L. X. Yuan, X. L. Hu, W. X. Zhang and Y. H. Huang, *Adv Mater*, 2012, **24**, 2047.
5. D. Li, L.-X. Ding, H. Chen, S. Wang, Z. Li, M. Zhu and H. Wang, *J. Mater. Chem. A*, 2014, **2**, 16617.
6. Z. Li, Z. Xu, X. Tan, H. Wang, C. M. B. Holt, T. Stephenson, B. C. Olsen and D. Mitlin, *Energy & Environmental Science*, 2013, **6**, 871.
7. N. Brun, S. R. S. Prabaharan, C. Surcin, M. Morcrette, H. Deleuze, M. Birot, O. Babot, M.-F. Achard and R. Backov, *The Journal of Physical Chemistry C*, 2012, **116**, 1408.
8. Y. Wu, M. V. Reddy, B. V. Chowdari and S. Ramakrishna, *ACS applied materials & interfaces*, 2013, **5**, 12175.
